# Supplementary material for: N6-methyladenosine in DNA promotes genome stability
Source: eLife. 2025 Apr 7;13:RP101626. doi: 10.7554/eLife.101626 (PMC11975372; doi:10.7554/eLife.101626)
Supplement: Figure 2—figure supplement 1—source data 1. [file elife-101626-fig2-figsupp1-data1.xlsx]

## Sheet: Figure S2A
	DLD1 UNGKO DMSO	DLD1 HPRT DMSO
Percentage of EdU+ cells (S phase)	33.83	34.3
	33.09	32.98
	32.39	35.24

## Sheet: Figure S2C
		% of cells with >5 mCherry foci
		DMSO			10 nM Raltitrexed			100 nM Raltitrexed			1000 nM Raltitrexed
DLD-1 UNGKO Cells	EV	0.073314	0.534224	0.11359	0.500981	0	0.564972	1.03891	2.33645	0	0.345682	1.06363	0.948767
	UNG2	0.182482	1.20882	1.2327	1.113	2.61316	2.99412	5.1541	8.00789	7.55272	5.54186	8.98322	6.25945

## Sheet: Figure S2E
		% of cells with >5 mCherry foci
		DMSO			HU			Gem			MMC
DLD-1 UNGKO Cells	EV	0.49	0.34	0	0	0.29	0	7	0	0	1.42	0	0.69
	UNG2	8.74	4.49	0.046	20.43	20.96	14.36	9.31	7.16	5.63	5.64	6.75	0.6

## Sheet: Figure S2G
	Treatment
	DMSO	Flox	Ralti	HU	Gem	MMC
Average mean nuclear intensity (gH2AX, a.u.)	76.8201	339.297	561.212	551.696	721.693	419.715
	76.9091	354.712	378.896	601.776	923.195	570.535
	111.391	651.624	620.172	701.934	1020.56	695.45

## Sheet: Figure S2H
	% Cell Viability (MTS)
5-FdU, nM	EV				UNG2				IDR				DPIP				DRPA				DIDR				IDR-C
0	100	100	100	100	100	100	100	100	100	100	100	100	100	100	100	100	100	100	100	100	100	100	100	100	100	100	100	100
2.048	100.352	102.978	97.6148	86.8813	100.942	100.96	99.8548	96.776	100.219	99.7239	95.3013	95.4308	100.453	99.5148	97.5505	97.8611	99.7864	99.4681	99.1189	98.9364	98.9414	98.5442	97.6025	99.1598	99.1111	99.1775	95.7	94.7089
5.12	78.2908	81.1171	72.7915	73.803	95.1467	93.9394	90.1434	86.2063	76.4684	74.9632	48.8699	56.3601	97.2619	94.9865	82.3485	89.9018	91.7957	93.2685	83.4458	91.2427	80.6994	79.0698	74.5833	88.9403	92.0356	91.0482	82.5492	84.5844
12.8	26.2379	24.7642	24.4346	26.5639	72.9446	64.2387	71.7009	65.9828	25.6476	26.8225	16.5147	19.8257	81.6707	82.1743	61.3874	78.6816	65.3853	64.8753	59.0926	80.0744	49.7353	43.7134	39.2021	60.5453	74.3644	67.5593	47.2619	66.1296
32	12.8282	11.9475	12.0318	12.4197	45.9073	37.2294	54.6923	52.3173	11.5104	13.1075	8.86201	11.3843	61.7719	57.7358	48.7285	65.007	45.1504	44.0572	41.4511	62.1698	28.8469	25.5625	27.4396	39.7291	43.2533	35.1377	33.7061	41.2852
80	8.17621	8.26706	8.71025	8.5122	36.2369	30.5477	41.9782	43.5977	7.80737	8.57879	6.2847	8.2091	44.4716	39.6945	36.6305	52.4719	33.7427	32.245	30.3337	46.3925	20.1512	18.4723	19.3295	26.9547	28.3778	23.2402	29.059	29.9524
200	7.38326	7.63825	7.73852	7.81508	23.3973	20.4404	27.1919	29.5842	6.58519	7.16127	5.98731	8.07357	28.3397	25.4447	24.2521	34.1865	21.351	20.763	20.8661	29.516	12.3819	11.6846	12.212	15.775	21.5467	16.9472	22.7921	22.2262
500	7.47137	8.02663	8.63858	8.5122	14.7048	13.5893	17.4623	19.0145	6.23386	6.94035	6.22522	8.59632	15.8179	14.3576	16.1743	21.1431	12.3509	11.8305	12.8234	17.8514	7.44801	7.29817	7.9041	8.53909	15.3067	11.9166	17.4316	16.8253
1250	10.7489	11.3557	12.5265	12.8784	11.3727	11.406	14.6306	15.6073	8.64648	9.14949	10.7851	12.1007	11.2836	3.75562	11.8175	15.2875	8.82719	8.62069	9.74878	12.7637	5.8034	6.14483	6.3495	6.32716	12.7111	9.5065	14.4813	14.5002
3125	20.5991	19.9556	23.0919	23.3719	13.2198	14.3986	16.9178	20.7547	15.1405	17.5626	18.6757	19.8483	10.3941	3.71968	11.6492	15.1122	9.25432	9.40939	10.0675	12.8701	7.86394	8.47041	7.19236	9.3107	12.9244	10.3864	14.8667	15.1593
