# Supplementary material for: N6-methyladenosine in DNA promotes genome stability
Source: eLife. 2025 Apr 7;13:RP101626. doi: 10.7554/eLife.101626 (PMC11975372; doi:10.7554/eLife.101626)
Supplement: Figure 2—source data 1. [file elife-101626-fig2-data1.xlsx]

## Sheet: Figure 2B
		% of cells with mCherry Foci
		DMSO			10 nM Floxuridine			100 nM Floxuridine			1000 nM Floxuridine
DLD-1 UNGKO Cells	EV	0.0733138	0.534224	0.111359	0.500981	0	0.564972	1.03896	2.33645	0	0.345682	1.06363	0.948767
	UNG2	0.182482	1.20882	1.2327	1.113	2.61316	2.99412	5.1541	8.00789	7.55272	5.54186	8.98322	6.25945
