# Supplementary material for: N6-methyladenosine in DNA promotes genome stability
Source: eLife. 2025 Apr 7;13:RP101626. doi: 10.7554/eLife.101626 (PMC11975372; doi:10.7554/eLife.101626)
Supplement: Figure 3—figure supplement 1—source data 2. [file elife-101626-fig3-figsupp1-data2.xlsx]

## Sheet: Figure S3A
	DMSO		STM4257
5-FdU (nM)	Mean	SEM	Mean	SEM
0.195	100	0.540755	100	2.82037
0.391	101.833	0.444748	81.2202	1.3565
0.781	100.629	1.21242	59.9002	1.73979
1.563	89.9093	1.24217	34.611	1.20465
3.125	62.8587	1.70941	19.9365	1.39003
6.25	24.1252	0.675991	13.1549	0.081777
12.5	18.9224	0.40097	12.6333	0.060008
25	17.2375	0.259211	12.9961	0.349168
50	15.4046	0.148121	12.4064	0.294851
100	15.1268	0.151553	14.0395	0.365014

## Sheet: Figure S3G
	Treatment
	DMSO	Flox	Flox + RNase H	Ralti	Ralti + RNaseH
Cells with N6-methyladenosine foci (%)	0	15.4328	11.6554	27.5906	17.2654
	0	11.941	11.7037	27.137	22.1681
	0.854701	4.34106	5.6047	17.0178	20.9458
	1.10614			23.646	28.2598

## Sheet: Figure S3H
	Treatment
	DMSO	FLOX	RNaseA	Dnase
Mean nuclear intensity of DAPI (normalized to DMSO)	1	0.705339	0.615962	0.162358
	1	0.944365	1.03379	0.440671
	1	0.712568	0.410903	0.088611
	1	0.736903	0.65779	0.093297
	1	0.786887	1.31796	0.115469

## Sheet: Figure S3L
	Treatment
	DMSO	METTL3i	Ralti	Ralti + METTL3i
Cells with 6mA foci (%)	0	0.363633	27.5906	23.6695
	0	0	27.137	12.5948
	0.854701	5.55556	17.0178	1.87493
	1.10614	7.92779	23.646	8.16768
