# Supplementary material for: N6-methyladenosine in DNA promotes genome stability
Source: eLife. 2025 Apr 7;13:RP101626. doi: 10.7554/eLife.101626 (PMC11975372; doi:10.7554/eLife.101626)
Supplement: Figure 3—source data 2. [file elife-101626-fig3-data2.xlsx]

## Sheet: Figure 3B
	% Cell viability (MTS)
[5-FdU], nM	sgHPRT		sgMETTL3		sgUNG		sgUNG+sgMETTL3
0	100	100	100	100	100	100	100	100
12.8	104.086	114.452	99.4322	96.8576	84.6875	98.3562	83.5539	67.9441
32	100.4	127.857	97.1819	85.7831	65.2632	46.8068	58.3071	40.1347
80	96.7355	115.266	90.8938	72.1744	55.6414	24.36	42.029	21.5174
200	91.6175	99.6801	81.9769	60.593	51.7928	15.9526	32.7872	14.552
500	79.781	84.7339	68.3912	54.4095	50.5921	13.2034	27.6412	13.4904
1250	59.5409	76.6793	42.4816	48.1247	48.4704	12.5034	31.1489	12.859
3125	43.0076	62.6926	33.9222	40.5727	51.0526	14.9825	39.0044	14.6038
7812.5	43.4078	56.8479	37.8759	35.7071	63.7007	26.8391	49.5064	20.5075
19531.2	49.5998	54.2018	44.7529	35.4283	69.3421	43.5732	58.139	30.088

## Sheet: Figure 3E
		Treatment
		DMSO	Flox	RNase A	Dnase
Percentage of cells with N6-methyladenonsine foci	Experiment 1	5.4	15.9	14.2	3
	Experiment 2	0.6	14.4	18.2	10
	Experiment 3	0	7.7	3.6	0.5
	Experiment 4	0	18.75	17.1642	3.04878
	Experiment 5	0.373704	22.1637	22.5954	0

## Sheet: Figure 3I
		Treatment
		DMSO	METTL3i	Flox	Flox + METTL3i
Percentage of cells with 6mA foci	Experiment 1	0	0.363633	15.4328	5.31632
	Experiment 2	0	0	11.941	7.3583
	Experiment 3	0.854701	5.55556	4.31058	2.95199
