# Supplementary material for: N6-methyladenosine in DNA promotes genome stability
Source: eLife. 2025 Apr 7;13:RP101626. doi: 10.7554/eLife.101626 (PMC11975372; doi:10.7554/eLife.101626)
Supplement: Figure 4—source data 1. [file elife-101626-fig4-data1.xlsx]

## Sheet: Figure 4B
		Treatment
		DMSO	METTL3i	Flox	Flox + METTL3i
% of cells with mCherry foci	Experiment 1	0.200803	3.55438	7.02603	5.81325
	Experiment 2	0.227273	4.04505	12.3175	4.32878
	Experiment 3	0.280112	7.55337	13.2992	5.61324

## Sheet: Figure 4C
		Treatment
		DMSO	METTL3i	Flox	Flox + METTL3i
Relative UNG mRNA level normalized to untreated control	Experiment 1	1	1.9805	0.281394	0.51
	Experiment 2	1	3.0495	0.292749	2.121
	Experiment 3	1	1.75985		0.591493
	Experiment 4	1	1.5811		0.450759

## Sheet: Figure 4E
		DLD-1
		HPRT		UNGKO
		DMSO	Flox	DMSO	Flox
% of cells with 6mA foci	Experiment 1	2.48644	13.1308	1.17064	11.9557
	Experiment 2	0.867186	14.0982	0.842141	4.37878
	Experiment 3	0	7.71173	2.32558	9.78107
	Experiment 4	0	4.34783	1.76471	7.92079
