# Supplementary material for: N6-methyladenosine in DNA promotes genome stability
Source: eLife. 2025 Apr 7;13:RP101626. doi: 10.7554/eLife.101626 (PMC11975372; doi:10.7554/eLife.101626)
Supplement: Figure 5—figure supplement 1—source data 1. [file elife-101626-fig5-figsupp1-data1.xlsx]

## Sheet: Figure S5B
	Treatment
	DMSO	Flox	Ralti	HU	Gem	MMC
Average mean nuclear intensity	0.00478524	0.016126	0.0145816	0.0453283	0.0632651	0.020783
	0.005488	0.024498	0.030782	0.038051	0.042724	0.023218
	0.005226	0.023221	0.023858		0.03934	0.013944
