# Supplementary material for: N6-methyladenosine in DNA promotes genome stability
Source: eLife. 2025 Apr 7;13:RP101626. doi: 10.7554/eLife.101626 (PMC11975372; doi:10.7554/eLife.101626)
Supplement: Figure 5—source data 1. [file elife-101626-fig5-data1.xlsx]

## Sheet: Figure 5A
[HU], uM	DMSO		METTL3i
x	Mean	SEM	Mean	SEM
0.977	100	3.41792	100	1.28378
1.953	103.674	4.47209	107.63	1.0747
3.906	110.029	3.93877	106.386	0.20851
7.813	112.07	1.6506	107.367	0.997974
15.625	109.31	4.30979	106.936	1.17562
31.25	108.299	1.63416	94.0445	1.69917
62.5	109.193	1.57985	74.2167	1.27824
125	107.852	3.41616	36.7017	1.54269
250	55.4713	0.943414	9.83018	0.399505
500	13.1001	0.166064	9.0409	0.289987

## Sheet: Figure 5B
[Gemcitabine], nM	DMSO		METTL3i
x	Mean	SEM	Mean	SEM
0.195	100	4.55199	100	4.24958
0.391	105.062	3.00501	84.8752	2.1568
0.781	102.988	2.29035	39.3781	0.667214
1.563	68.6207	0.288225	11.5495	0.272807
3.125	15.8714	0.904098	7.21192	0.207401
6.25	7.44813	0.082988	6.00993	0.145486
12.5	7.24066	0.231028	6.81996	0.163183
25	6.43154	0.109782	6.66318	0.163183
50	5.64315	0.33389	5.33055	0.119743
100	5.99585	0.136046	6.48027	0.301347

## Sheet: Figure 5C
[MMC], nM	DMSO		METTL3i
x	Mean	SEM	Mean	SEM
0.977	100	1.22226	100	2.03687
1.953	96.4454	2.0975	80.9887	1.927
3.906	73.5111	3.1627	42.8431	0.260281
7.813	26.3377	0.477195	14.6335	0.136935
15.625	12.5165	0.382374	11.9036	0.435116
31.25	11.8737	0.27852	13.6006	0.346944
62.5	10.3044	0.236906	9.17364	0.234614
125	6.57969	0.204512	4.15642	0.260281
250	1.77727	0.037814	1.42646	0.277163
500	1.70165	0.086644	1.89375	0.172159

## Sheet: Figure 5E
	Treatment
	DMSO	HU	Gemcitabine	MMC
Percentage of cells with 6mA foci	0	54.5455	78.7234	4.0404
	1.40449	33.2756	60.3691	5.41176
	0.233645		53.6585	0
